# Supplementary material
Source: MDPI journal article supplement (https://www.mdpi.com/2227-9717/11/12/3410)
Supplement: s1 [file s1]

## Supplementary Materials

Article

# Alternative Options for Ebullated Bed Vacuum Residue Hydrocracker Naphtha Utilization

Dicho Stratiev <sup>1,2,\*</sup>, Ivelina Shishkova <sup>1</sup>, Mihail Ivanov <sup>1</sup>, Rosen Dinkov <sup>1</sup>, Vesislava Toteva <sup>3</sup>, Daniela Angelova <sup>3</sup>, Iliyan Kolev <sup>1</sup>, Mariana Tavlieva <sup>1</sup> and Dobromir Yordanov <sup>4</sup>

<sup>1</sup> LUKOIL Neftohim Burgas, 8104 Burgas, Bulgaria; shishkova.ivelina.k@neftochim.bg (I.S.); ivanov.mihail.i@neftochim.bg (M.I.); dinkov.rosen.k@neftochim.bg (R.D.); kolev.iliyan.v@neftochim.bg (I.K.); tavlieva.mariana.p@neftochim.bg (M.T.)

<sup>2</sup> Institute of Biophysics and Biomedical Engineering, Bulgarian Academy of Sciences, Georgi Bonchev 105, 1113 Sofia, Bulgaria

<sup>3</sup> Department Chemical Technologies, University of Chemical Technology and Metallurgy, Kliment Ohridski 8, 1756 Sofia, Bulgaria; vesislava@uctm.edu (V.T.)

<sup>4</sup> Department Industrial Technologies and Management, University Prof. Dr. Assen Zlatarov, Professor Yakimov 1, 8010 Burgas, Bulgaria

\* Correspondence: stratiev.dicho@neftochim.bg

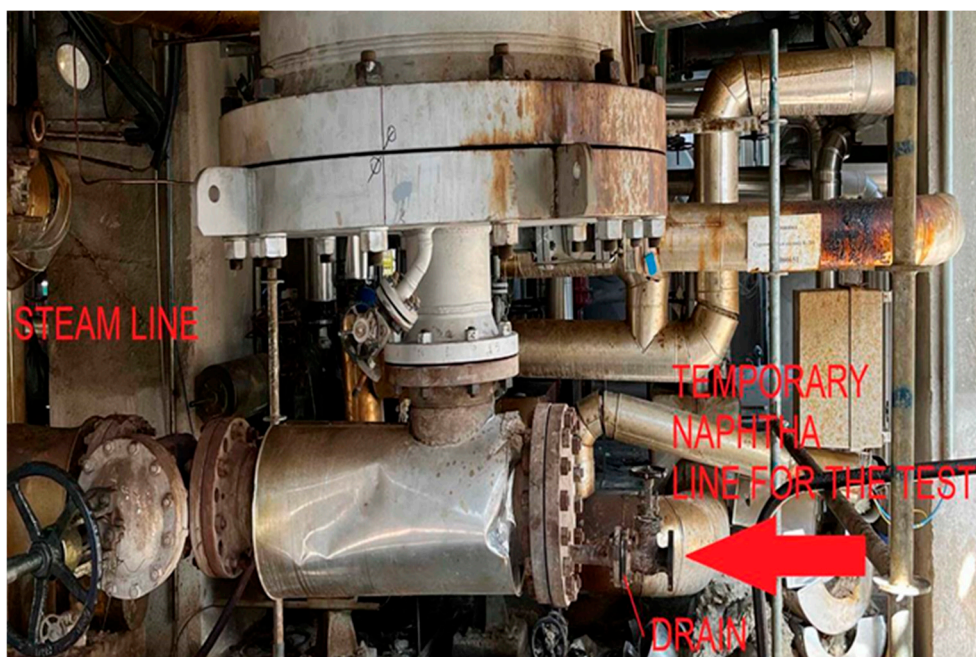

**Figure S1.** Selected point to feed the H-Oil naphtha in the FCC riser (with the lift steam).

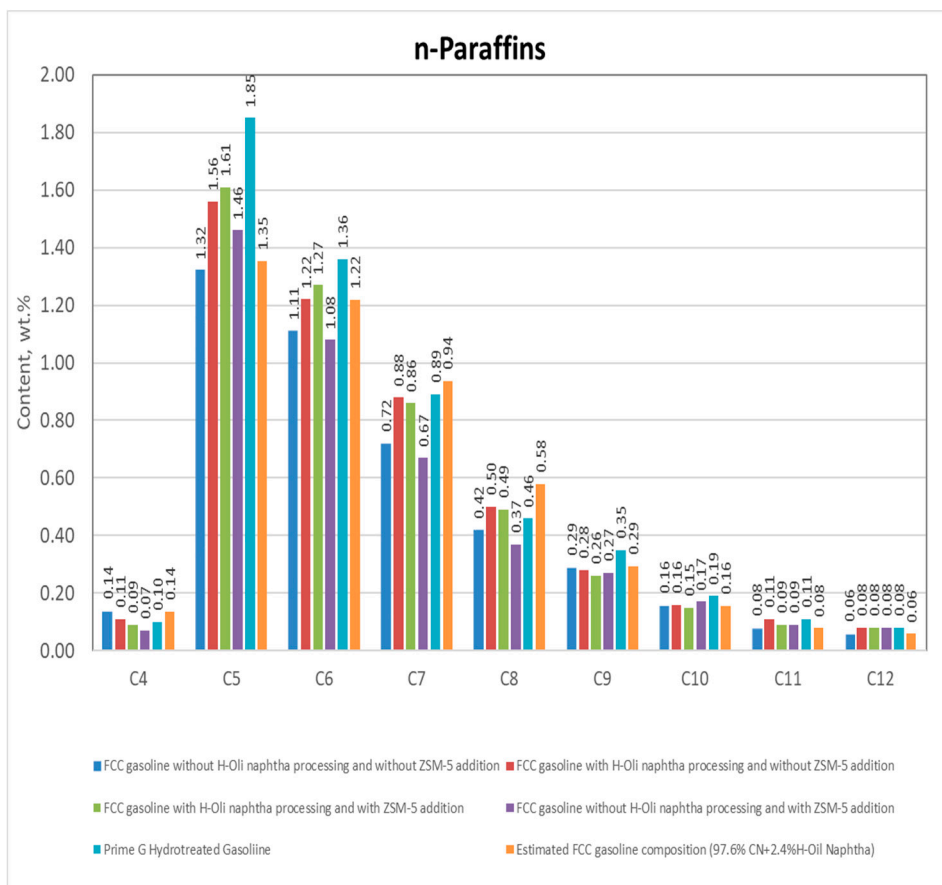

**Figure S2.** Distribution of n-paraffins by number of carbon atoms in studied FCC gasoline samples.

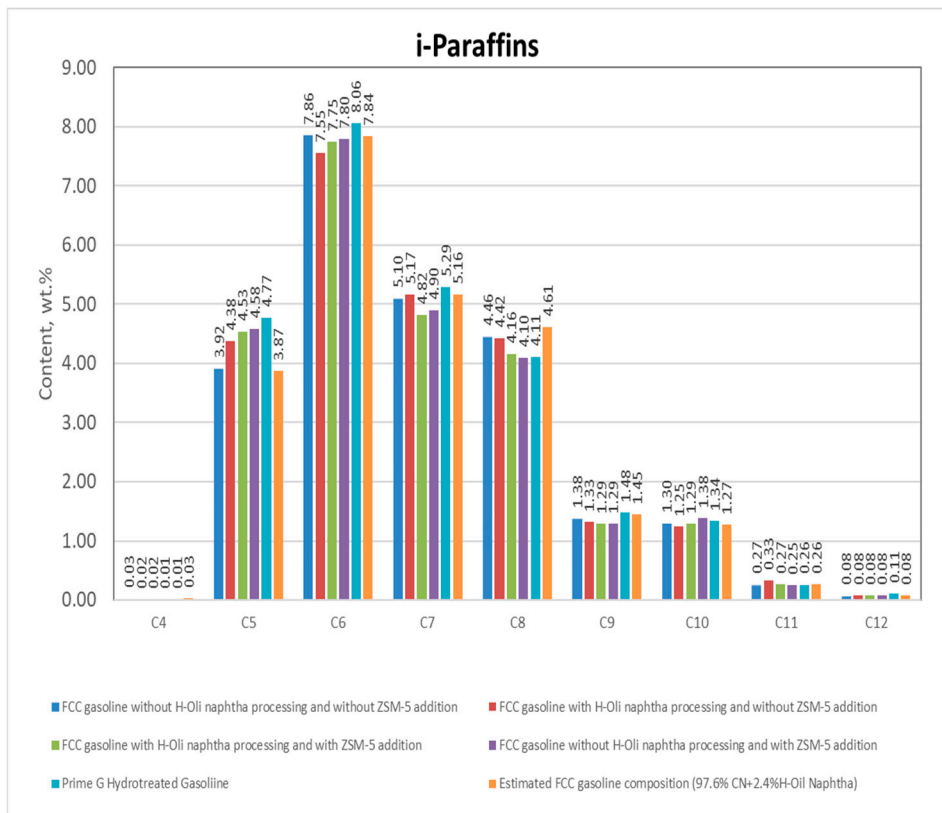

**Figure S3.** Distribution of iso-paraffins by number of carbon atoms in studied FCC gasoline samples.

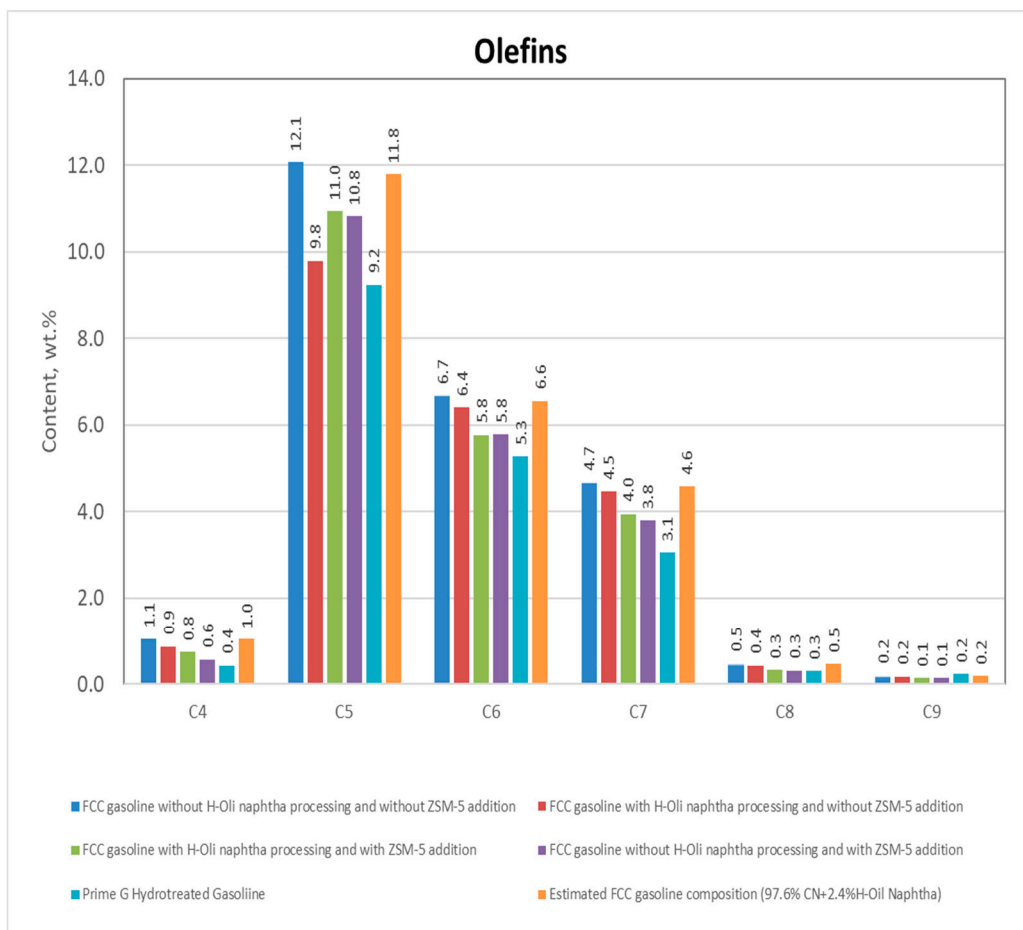

**Figure S4.** Distribution of olefins by number of carbon atoms in studied FCC gasoline samples.

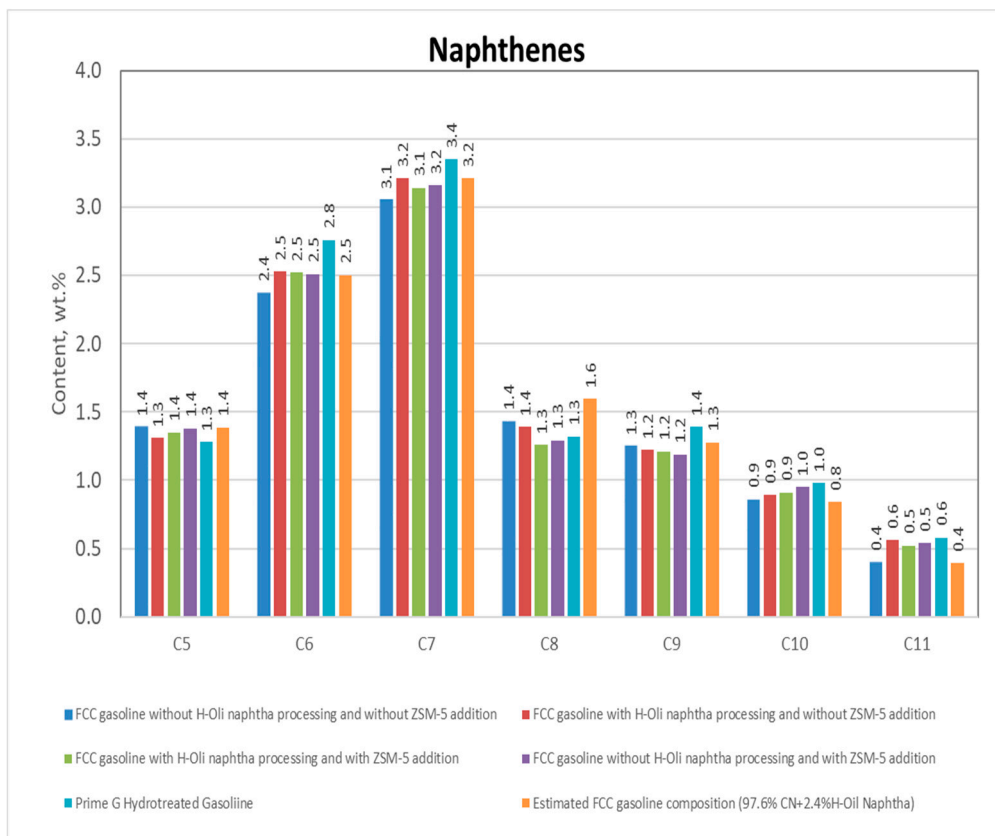

**Figure S5.** Distribution of naphthenes by number of carbon atoms in studied FCC gasoline samples.

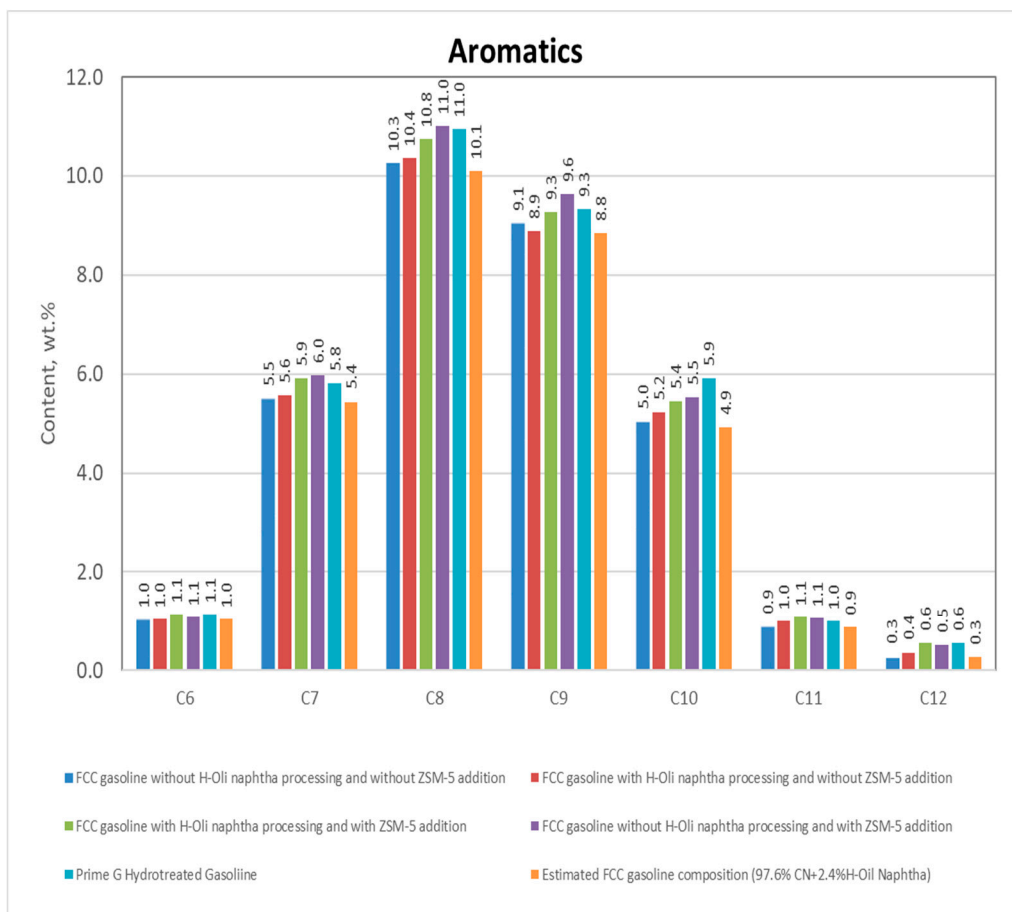

**Figure S6.** Distribution of aromatics by number of carbon atoms in studied FCC gasoline samples.

**Table S1.** Composition and RON, and MON of five investigated gasoline blends.

| Components                               | Gasoline blend<br>composition<br>without naphtha,<br>vol.% | Gasoline blend composition with naphtha, vol.% |        |        |        |  |
|------------------------------------------|------------------------------------------------------------|------------------------------------------------|--------|--------|--------|--|
|                                          |                                                            |                                                |        |        |        |  |
| Blend No                                 | 1                                                          | 2                                              | 3      | 4      | 5      |  |
| Prime-G+<br>hydrotreated FCC<br>gasoline | 53.65                                                      | 51.50                                          | 49.35  | 47.21  | 45.06  |  |
| Reformate                                | 26.04                                                      | 25.00                                          | 23.96  | 22.92  | 21.88  |  |
| Alkylate                                 | 13.54                                                      | 13.00                                          | 12.46  | 11.92  | 11.38  |  |
| Naphtha                                  |                                                            | 4.00                                           | 8.00   | 12.00  | 16.00  |  |
| MTBE                                     | 6.77                                                       | 6.50                                           | 6.23   | 5.96   | 5.69   |  |
| Total                                    | 100.00                                                     | 100.00                                         | 100.00 | 100.00 | 100.00 |  |
| RON of the blend                         | 96.7                                                       | 95.90                                          | 94.7   | 93.9   | 92.7   |  |
| MON of the blend                         | 85.4                                                       | 85.00                                          | 84.5   | 84.1   | 83.8   |  |
